# Supplementary material
Source: publisher site journal article supplement (https://www.dovepress.com/article/594752)
Supplement: Supplementary file 1 [file 594752_Supplementary.docx]

**Supplementary Table S1. Operational definitions and coding of key clinical variables**

| Variable | Operational definition | Coding used in analyses | Data source / reference |
| --- | --- | --- | --- |
| Diabetes-related complications (count) | Defined according to guideline1. Complications included diabetic retinopathy, diabetic peripheral neuropathy, diabetic nephropathy, diabetes-related cardio-/cerebrovascular complications, diabetic lower-extremity arterial disease, diabetic foot, and diabetes-related infection. The number of present complications was summed for each participant. | Continuous count (integer). In descriptive table, reported as median (Q1, Q3). | Electronic medical records; guideline23 |
| Diabetic retinopathy | Presence of diabetic retinopathy documented in the medical record during the current admission or previous diagnosis. | Yes / No | Medical records; guideline23 |
| Diabetic peripheral neuropathy | Presence of diabetic peripheral neuropathy documented in the medical record. | Yes / No | Medical records; guideline23 |
| Diabetic nephropathy | Presence of diabetic nephropathy documented in the medical record. | Yes / No | Medical records; guideline23 |
| Diabetes-related cardio-/cerebrovascular complications | Diabetes-related cardiovascular or cerebrovascular complications documented in the medical record (eg, coronary heart disease, stroke, etc., as recorded by clinicians). | Yes / No | Medical records; guideline23 |
| Diabetic lower-extremity arterial disease | Documented diabetic lower-extremity arterial disease / peripheral arterial disease. | Yes / No | Medical records; guideline23 |
| Diabetic foot | Documented diabetic foot during admission or previous diagnosis. | Yes / No | Medical records; guideline23 |
| Diabetes-related infection | Documented diabetes-related infection (eg, skin/soft tissue infection, urinary tract infection, etc., as recorded by clinicians). | Yes / No | Medical records; guideline23 |
| Non-diabetes comorbid chronic diseases (count category) | Defined according to guideline1 and ICD-10 codes. Chronic diseases included hypertension (I10–I15), dyslipidemia (E78), hyperuricemia (E79), osteoporosis (M80–M81), cardiovascular diseases (I20–I25, I27, I30–I52), and chronic respiratory diseases (J40–J47). The number of comorbid chronic diseases was counted. | None = 0; 1–2 conditions = 1; ≥3 conditions = 2. | Medical records; guideline24 |
| Hypertension | ICD-10: I10–I15. | Yes / No | Medical records; guideline24 |
| Dyslipidemia | ICD-10: E78. | Yes / No | Medical records; guideline24 |
| Hyperuricemia | ICD-10: E79. | Yes / No | Medical records; guideline24 |
| Osteoporosis | ICD-10: M80–M81. | Yes / No | Medical records; guideline24 |
| Cardiovascular diseases | ICD-10: I20–I25, I27, I30–I52. | Yes / No | Medical records; guideline24 |
| Chronic respiratory diseases | ICD-10: J40–J47. | Yes / No | Medical records; guideline24 |

**Abbreviations:** HbA1c, glycated hemoglobin; ICD-10, International Classification of Diseases, 10th Revision.

**Supplementary Table S2** Comparison of Baseline Characteristics Between the Training and Test Sets.

| Variables | Total(n = 523) | Training set(n=366) | Test set(n=157) | Statistic | *P* |
| --- | --- | --- | --- | --- | --- |
| Sex, n (%) |  |  |  | χ²=0.08 | 0.78 |
| Male | 235 (44.93) | 163 (44.54) | 72 (45.86) |  |  |
| Female | 288 (55.07) | 203 (55.46) | 85 (54.14) |  |  |
| Marital status, n (%) |  |  |  | χ²=0.02 | 0.88 |
| Married | 445 (85.09) | 312 (85.25) | 133 (84.71) |  |  |
| Unmarried/Divorced/Widowed | 78 (14.91) | 54 (14.75) | 24 (15.29) |  |  |
| Educational level, n (%) |  |  |  |  |  |
| Illiterate | 52 (9.94) | 35 (9.56) | 17 (10.83) | χ²=2.94 | 0.40 |
| Primary school | 304 (58.13) | 216 (59.02) | 88 (56.05) |  |  |
| Junior middle school | 91 (17.40) | 58 (15.85) | 33 (21.02) |  |  |
| Senior high school or above | 76 (14.53) | 57 (15.57) | 19 (12.10) |  |  |
| Residence, n (%) |  |  |  | χ²=0.20 | 0.66 |
| Urban | 329 (62.91) | 228 (62.30) | 101 (64.33) |  |  |
| Rural | 194 (37.09) | 138 (37.70) | 56 (35.67) |  |  |
| Occupational physical activity type, n (%) |  |  |  | χ²=1.32 | 0.72 |
| Mainly manual labor | 199 (38.05) | 136 (37.16) | 63 (40.13) |  |  |
| Mainly mental work | 110 (21.03) | 75 (20.49) | 35 (22.29) |  |  |
| Mixed manual and mental work | 165 (31.55) | 118 (32.24) | 47 (29.94) |  |  |
| Unemployed | 49 (9.37) | 37 (10.11) | 12 (7.64) |  |  |
| Monthly per-capita household income, n (%) |  |  |  | χ²=4.88 | 0.09 |
| Good | 101 (19.31) | 62 (16.94) | 39 (24.84) |  |  |
| Average | 286 (54.68) | 203 (55.46) | 83 (52.87) |  |  |
| Poor | 136 (26.00) | 101 (27.60) | 35 (22.29) |  |  |
| Living arrangement, n (%) |  |  |  | χ²=3.56 | 0.31 |
| Living with spouse | 286 (54.68) | 197 (53.83) | 89 (56.69) |  |  |
| Living with children | 75 (14.34) | 48 (13.11) | 27 (17.20) |  |  |
| Living with spouse and children | 121 (23.14) | 92 (25.14) | 29 (18.47) |  |  |
| Living alone | 41 (7.84) | 29 (7.92) | 12 (7.64) |  |  |
| Type of medical payment, n (%) |  |  |  | χ²=3.73 | 0.15 |
| Urban Employee Basic Medical Insurance | 188 (35.95) | 122 (33.33) | 66 (42.04) |  |  |
| Urban and Rural Resident Basic Medical Insurance | 262 (50.10) | 192 (52.46) | 70 (44.59) |  |  |
| Out-of-pocket payment or commercial insurance | 73 (13.96) | 52 (14.21) | 21 (13.38) |  |  |
| Smoking history, n (%) |  |  |  | χ²=3.73 | 0.15 |
| No | 425 (81.26) | 302 (82.51) | 123 (78.34) |  |  |
| Yes | 98 (18.74) | 64 (17.49) | 34 (21.66) |  |  |
| Alcohol drinking history, n (%) |  |  |  | χ²=0.42 | 0.52 |
| No | 454 (86.81) | 320 (87.43) | 134 (85.35) |  |  |
| Yes | 69 (13.19) | 46 (12.57) | 23 (14.65) |  |  |
| Cognitive activities, n (%) |  |  |  | χ²=0.13 | 0.72 |
| Less than or equal to 3 days per week | 359 (68.64) | 253 (69.13) | 106 (67.52) |  |  |
| More than 3 days per week | 164 (31.36) | 113 (30.87) | 51 (32.48) |  |  |
| Family history of diabetes, n (%) |  |  |  | χ²=0.91 | 0.34 |
| No | 485 (92.73) | 342 (93.44) | 143 (91.08) |  |  |
| Yes | 38 (7.27) | 24 (6.56) | 14 (8.92) |  |  |
| Diabetic neuropathy, n (%) |  |  |  | χ²=2.85 | 0.09 |
| No | 257 (49.14) | 171 (46.72) | 86 (54.78) |  |  |
| Yes | 266 (50.86) | 195 (53.28) | 71 (45.22) |  |  |
| Diabetic retinopathy, n (%) |  |  |  | χ²=0.80 | 0.37 |
| No | 301 (57.55) | 206 (56.28) | 95 (60.51) |  |  |
| Yes | 222 (42.45) | 160 (43.72) | 62 (39.49) |  |  |
| Diabetic lower-extremity arterial disease, n (%) |  |  |  | χ²=0.32 | 0.57 |
| No | 359 (68.64) | 254 (69.40) | 105 (66.88) |  |  |
| Yes | 164 (31.36) | 112 (30.60) | 52 (33.12) |  |  |
| Diabetic nephropathy, n (%) |  |  |  | χ²=1.10 | 0.29 |
| No | 356 (68.07) | 244 (66.67) | 112 (71.34) |  |  |
| Yes | 167 (31.93) | 122 (33.33) | 45 (28.66) |  |  |
| Diabetic foot, n (%) |  |  |  | χ²=0.20 | 0.66 |
| No | 471 (90.06) | 331 (90.44) | 140 (89.17) |  |  |
| Yes | 52 (9.94) | 35 (9.56) | 17 (10.83) |  |  |
| Hypertension, n (%) |  |  |  | χ²=0.20 | 0.65 |
| No | 242 (46.27) | 167 (45.63) | 75 (47.77) |  |  |
| Yes | 281 (53.73) | 199 (54.37) | 82 (52.23) |  |  |
| Dyslipidemia, n (%) |  |  |  | χ²=1.85 | 0.17 |
| No | 382 (73.04) | 261 (71.31) | 121 (77.07) |  |  |
| Yes | 141 (26.96) | 105 (28.69) | 36 (22.93) |  |  |
| Hyperuricemia, n (%) |  |  |  | χ²=1.25 | 0.26 |
| No | 498 (95.22) | 346 (94.54) | 152 (96.82) |  |  |
| Yes | 25 (4.78) | 20 (5.46) | 5 (3.18) |  |  |
| Osteoporosis, n (%) |  |  |  | χ²=1.12 | 0.29 |
| No | 443 (84.70) | 314 (85.79) | 129 (82.17) |  |  |
| Yes | 80 (15.30) | 52 (14.21) | 28 (17.83) |  |  |
| Cardiovascular disease, n (%) |  |  |  | χ²=0.01 | 0.93 |
| No | 248 (47.42) | 174 (47.54) | 74 (47.13) |  |  |
| Yes | 275 (52.58) | 192 (52.46) | 83 (52.87) |  |  |
| Respiratory disease, n (%) |  |  |  | χ²=0.13 | 0.72 |
| No | 483 (92.35) | 337 (92.08) | 146 (92.99) |  |  |
| Yes | 40 (7.65) | 29 (7.92) | 11 (7.01) |  |  |
| Gastrointestinal disease, n (%) |  |  |  | χ²=0.22 | 0.64 |
| No | 475 (90.82) | 331 (90.44) | 144 (91.72) |  |  |
| Yes | 48 (9.18) | 35 (9.56) | 13 (8.28) |  |  |
| Hypoglycemia in the past 6 months, n (%) |  |  |  | χ²=0.00 | 0.98 |
| No | 460 (87.95) | 322 (87.98) | 138 (87.90) |  |  |
| Yes | 63 (12.05) | 44 (12.02) | 19 (12.10) |  |  |
| HbA1c, n (%) | 9.95 ± 4.72 | 10.08 ± 5.40 | 9.66 ± 2.45 | t=-0.92 | 0.36 |
| Age, Mean ± SD | 74.31 ± 6.36 | 74.08 ± 6.18 | 74.86 ± 6.77 | t=1.29 | 0.20 |
| Physical exercise, Mean ± SD | 2.76 ± 1.77 | 2.82 ± 1.79 | 2.60 ± 1.70 | t=-1.33 | 0.18 |
| Insomnia symptoms, Mean ± SD | 5.42 ± 4.44 | 5.39 ± 4.43 | 5.49 ± 4.47 | t=0.25 | 0.80 |
| Nutritional status, Mean ± SD | 10.96 ± 2.45 | 11.06 ± 2.37 | 10.72 ± 2.61 | t=-1.45 | 0.15 |
| Depressive symptoms, Mean ± SD | 4.77 ± 2.82 | 4.67 ± 2.81 | 5.01 ± 2.85 | t=1.29 | 0.20 |
| Perceived social support score, Mean ± SD | 46.14 ± 14.25 | 45.84 ± 14.34 | 46.86 ± 14.07 | t=0.75 | 0.45 |
| Duration of diabetes (years), M (Q₁, Q₃) | 12.00 (6.00, 20.00) | 12.00 (6.25, 20.75) | 12.00 (5.00, 20.00) | Z=-1.01 | 0.31 |
| Diabetes-related complications, M (Q₁, Q₃) | 2.00 (1.00, 3.00) | 2.00 (1.00, 3.00) | 2.00 (1.00, 3.00) | Z=-0.49 | 0.62 |
| Non-diabetes comorbid chronic diseases, M (Q₁, Q₃) | 2.00 (1.00, 2.00) | 2.00 (1.00, 2.00) | 2.00 (1.00, 2.00) | Z=-0.50 | 0.62 |

**Table S3** Distribution of Cognitive Frailty, Physical Frailty, and MCI in the Total, Training, and Test Sets.

| **Variables** | **Classification** | **Total(n=523)** | **Training set(n=366)** | **Test set(n=157)** | Statistic | *P* |
| --- | --- | --- | --- | --- | --- | --- |
| Cognitive Frailty | CF | 217 (41.49) | 149 (40.71) | 68 (43.31) | χ²=0.31 | 0.580 |
| Non-CF | 306 (58.51) | 217 (59.29) | 89 (56.69) |
| Physical Frailty Status | Frail | 250 (47.80) | 170 (46.45) | 80 (50.96) | χ²=1.52 | 0.468 |
| Prefrail | 226 (43.21) | 160 (43.72) | 66 (42.04) |
| Non-frail | 47 (8.99) | 36 (9.84) | 11 (7.01) |
| MCI | Yes | 280 (53.54) | 199 (54.37) | 81 (51.59) | χ²=0.34 | 0.559 |
| No | 243 (46.46) | 167 (45.63) | 76 (48.41) |

**Abbreviations:** CF, cognitive frailty; MCI, Mild Cognitive Impairment.
